# Supplementary material
Source: publisher figshare collection journal article supplement (https://gsajournals.figshare.com/ndownloader/files/13687628)
Supplement: Supplementary file 1 [file 13687628]

## Sheet: cob cox1
	cds positions	170	205	243	386	709	720	900	972	1107	1132					394	415	429	506	758	806
COX1_s288c	strains	intron1	intron2	intron3*	intron4a	intron4b	intron4	intron5a	intron5	intron6*	intron7			COB	strains	intron1	intron2	intron3*	intron4	intron5	intron6
	Q0045_s288c	1	1	1	0	0	1	0	1	1	1				Q0045_s288c	0	1	1	1	1	1
	YJM1078	1	0	1	0	1	0	0	0	1	1	YJM1078			YJM1078	0	1	1	1	1	1
	YJM1083	1	1	1	0	0	1	1	0	1	1	YJM1083			YJM1083	0	1	1	1	1	1
	YJM1129	0	0	1	0	1	0	1	0	1	1	YJM1129			YJM1129	0	1	1	1	1	1
	YJM1133	0	0	1	0	1	1	1	0	1	1	YJM1133			YJM1133	0	1	1	1	1	1
	YJM1190	1	1	1	0	1	1	1	0	1	1	YJM1190			YJM1190	0	1	1	1	1	1
	YJM1199	1	1	1	0	1	1	0	1	1	1	YJM1199			YJM1199	0	1	1	1	1	1
	YJM1202	1	1	1	0	1	1	0	1	1	1	YJM1202			YJM1202	0	1	1	1	1	1
	YJM1208	1	0	1	0	0	1	1	0	1	0	YJM1208			YJM1208	0	1	1	1	1	1
	YJM1242	1	0	1	0	1	0	0	0	0	0	YJM1242			YJM1242	0	1	1	1	1	1
	YJM1244	1	0	1	0	1	0	0	0	0	0	YJM1244			YJM1244	0	1	1	1	1	1
	YJM1248	1	0	1	0	0	1	0	1	0	0	YJM1248			YJM1248	0	0	1	1	1	1
	YJM1250	0	1	1	0	0	1	0	1	1	0	YJM1250			YJM1250	0	1	1	1	1	1
	YJM1252	1	1	1	0	1	0	0	0	1	1	YJM1252			YJM1252	0	1	1	1	1	1
	YJM1273	0	1	0	0	0	0	0	1	1	1	YJM1273			YJM1273	0	1	1	1	1	1
	YJM1304	1	1	1	0	0	1	0	1	1	1	YJM1304			YJM1304	0	0	0	0	1	1
	YJM1307	0	0	1	0	0	1	1	0	1	1	YJM1307			YJM1307	0	1	1	1	1	1
	YJM1311	1	0	1	0	1	1	1	0	1	1	YJM1311			YJM1311	0	1	1	1	1	1
	YJM1326	0	0	1	0	1	1	1	0	1	1	YJM1326			YJM1326	0	1	1	1	1	1
	YJM1332	0	0	0	0	0	1	1	0	1	1	YJM1332			YJM1332	0	1	1	1	1	1
	YJM1336	1	0	1	0	1	0	0	1	1	1	YJM1336			YJM1336	0	1	1	1	1	1
	YJM1338	0	1	1	0	1	0	0	0	0	0	YJM1338			YJM1338	0	1	1	1	1	1
	YJM1341	0	1	1	0	0	1	0	1	1	1	YJM1341			YJM1341	0	1	1	1	1	1
	YJM1342	1	1	1	0	1	0	0	0	1	1	YJM1342			YJM1342	0	1	1	1	1	1
	YJM1355	0	0	1	0	0	1	0	0	0	0	YJM1355			YJM1355	0	1	1	1	1	1
	YJM1356	1	0	1	0	0	1	0	0	1	1	YJM1356			YJM1356	0	1	1	1	1	1
	YJM1381	1	0	1	0	0	1	1	0	1	1	YJM1381			YJM1381	0	1	1	1	1	1
	YJM1383	1	1	1	0	0	1	1	0	0	0	YJM1383			YJM1383	0	1	1	1	1	1
	YJM1385	1	1	1	0	1	1	1	0	1	1	YJM1385			YJM1385	0	1	1	1	1	1
	YJM1386	1	0	1	0	1	1	1	0	1	1	YJM1386			YJM1386	0	1	1	1	1	1
	YJM1387	1	0	1	0	1	0	0	1	1	1	YJM1387			YJM1387	0	0	0	1	1	1
	YJM1388	1	1	1	0	0	0	0	0	1	1	YJM1388			YJM1388	0	0	0	0	1	1
	YJM1389	1	1	1	0	0	1	0	0	1	1	YJM1389			YJM1389	0	0	0	1	1	1
	YJM1399	1	0	1	1	0	0	0	1	1	0	YJM1399			YJM1399	0	0	0	0	0	0
	YJM1400	1	1	1	0	0	1	1	0	1	1	YJM1400			YJM1400	1	1	1	1	1	1
	YJM1401	0	0	1	0	0	1	1	0	1	1	YJM1401			YJM1401	0	1	1	1	1	1
	YJM1402	0	0	1	0	1	0	1	0	1	1	YJM1402			YJM1402	0	1	1	1	1	1
	YJM1415	1	1	1	0	1	0	0	0	1	1	YJM1415			YJM1415	0	1	1	1	1	1
	YJM1417	0	1	1	0	0	1	0	0	1	1	YJM1417			YJM1417	0	1	1	1	1	1
	YJM1418	0	0	1	0	1	0	0	1	1	1	YJM1418			YJM1418	0	0	0	1	1	1
	YJM1419	1	1	1	0	0	1	0	1	1	0	YJM1419			YJM1419	0	1	1	1	1	1
	YJM1433	0	1	1	0	0	1	0	1	0	0	YJM1433			YJM1433	0	1	1	1	1	1
	YJM1434	0	1	0	0	0	0	0	1	1	1	YJM1434			YJM1434	0	1	1	1	1	1
	YJM1439	1	0	1	0	0	1	0	1	0	0	YJM1439			YJM1439	0	0	1	1	1	1
	YJM1443	1	1	1	0	0	1	1	0	1	0	YJM1443			YJM1443	0	0	0	0	1	1
	YJM1444	1	1	1	0	0	1	0	1	1	1	YJM1444			YJM1444	0	0	0	1	1	1
	YJM1447	0	0	0	0	1	0	1	0	1	0	YJM1447			YJM1447	0	0	0	1	1	1
	YJM1450	0	0	1	0	0	1	1	0	1	1	YJM1450			YJM1450	0	1	1	1	1	1
	YJM1460	1	1	1	0	1	0	0	0	1	1	YJM1460			YJM1460	0	0	0	1	1	1
	YJM1463	1	0	0	0	0	1	1	0	0	0	YJM1463			YJM1463	0	1	1	1	1	1
	YJM1477	1	0	1	0	1	0	0	0	0	0	YJM1477			YJM1477	0	1	1	1	1	1
	YJM1478	1	1	1	0	1	0	0	1	0	0	YJM1478			YJM1478	0	1	1	1	1	1
	YJM1479	1	1	1	0	0	1	1	0	1	1	YJM1479			YJM1479	1	1	1	1	1	1
	YJM1526	0	0	1	0	1	0	1	0	1	1	YJM1526			YJM1526	0	1	1	1	1	1
	YJM1527	0	1	1	0	0	0	0	1	1	1	YJM1527			YJM1527	0	1	1	1	1	1
	YJM1549	0	0	0	0	0	1	1	0	1	1	YJM1549			YJM1549	0	1	1	1	1	1
	YJM1573	0	0	1	0	1	0	1	0	1	1	YJM1573			YJM1573	0	1	1	1	1	1
	YJM1574	0	0	1	0	0	1	0	0	1	1	YJM1574			YJM1574	0	1	1	1	1	1
	YJM1592	1	1	1	0	0	1	0	0	1	1	YJM1592			YJM1592	0	0	0	1	1	1
	YJM1615	1	0	1	0	0	1	1	0	1	0	YJM1615			YJM1615	0	1	1	1	1	1
	YJM189	0	1	1	0	1	0	0	0	0	0	YJM189			YJM189	0	1	1	1	1	1
	YJM193	1	1	1	0	0	1	0	0	0	0	YJM193			YJM193	0	1	1	1	1	1
	YJM195	1	1	0	0	0	1	1	0	0	0	YJM195			YJM195	0	1	1	1	1	1
	YJM244	0	1	1	0	1	0	0	0	0	0	YJM244			YJM244	0	1	1	1	1	1
	YJM248	1	1	1	0	1	0	0	0	1	1	YJM248			YJM248	0	1	1	1	1	1
	YJM270	0	0	1	0	1	0	1	0	1	1	YJM270			YJM270	0	1	1	1	1	1
	YJM271	1	1	1	0	0	1	0	0	0	0	YJM271			YJM271	0	1	1	1	1	1
	YJM320	1	0	1	0	1	1	1	0	1	1	YJM320			YJM320	0	1	1	1	1	1
	YJM326	1	0	1	0	1	1	1	0	1	1	YJM326			YJM326	1	1	1	1	1	1
	YJM428	1	0	1	0	0	1	0	0	1	1	YJM428			YJM428	0	1	1	1	1	1
	YJM450	1	0	1	0	0	1	0	1	1	1	YJM450			YJM450	0	1	1	1	1	1
	YJM451	1	0	1	0	0	1	1	0	1	0	YJM451			YJM451	0	1	1	1	1	1
	YJM453	1	0	1	0	0	1	0	0	1	1	YJM453			YJM453	0	1	1	1	1	1
	YJM456	1	1	1	0	0	1	1	0	1	0	YJM456			YJM456	0	0	0	0	1	1
	YJM470	1	1	1	0	0	1	0	1	1	0	YJM470			YJM470	0	1	1	1	1	1
	YJM541	1	0	1	0	1	1	1	0	1	1	YJM541			YJM541	0	1	1	1	1	1
	YJM554	1	0	1	0	1	1	1	0	1	1	YJM554			YJM554	0	1	1	1	1	1
	YJM555	1	0	1	0	0	1	1	0	1	1	YJM555			YJM555	0	1	1	1	1	1
	YJM627	1	0	1	0	0	1	0	1	0	0	YJM627			YJM627	0	1	1	1	1	1
	YJM681	0	0	1	0	0	1	1	0	1	1	YJM681			YJM681	0	1	1	1	1	1
	YJM682	1	0	1	0	1	1	1	0	1	1	YJM682			YJM682	1	1	1	1	1	1
	YJM683	1	0	1	0	1	1	1	0	1	1	YJM683			YJM683	1	1	1	1	1	1
	YJM689	0	0	1	0	0	1	1	0	1	1	YJM689			YJM689	0	1	1	1	1	1
	YJM693	1	1	1	0	1	1	0	1	1	1	YJM693			YJM693	0	1	1	1	1	1
	YJM969	0	1	1	0	0	0	0	0	1	1	YJM969			YJM969	0	1	1	1	1	1
	YJM972	0	1	1	0	0	0	0	0	1	1	YJM972			YJM972	0	1	1	1	1	1
	YJM975	0	1	1	0	0	0	0	0	1	1	YJM975			YJM975	0	1	1	1	1	1
	YJM978	0	1	1	0	0	0	0	0	1	1	YJM978			YJM978	0	1	1	1	1	1
	YJM981	0	1	1	0	0	0	0	0	1	1	YJM981			YJM981	0	1	1	1	1	1
	YJM984	0	1	1	0	0	0	0	0	1	1	YJM984			YJM984	0	1	1	1	1	1
	YJM987	0	1	1	0	0	0	0	0	1	1	YJM987			YJM987	0	1	1	1	1	1
	YJM990	0	1	1	0	0	0	0	0	1	1	YJM990			YJM990	0	1	1	1	1	1
	YJM993	0	1	1	0	0	0	0	0	1	1	YJM993			YJM993	0	1	1	1	1	1
	YJM996	0	1	1	0	0	0	0	0	1	1	YJM996			YJM996	0	1	1	1	1	1
	sk1	1	?	1	0	0	1	1	0	1	1	sk1			sk1	0	0	1	1	1	1
	yjm789	1	1	1	0	1	1	1	0	1	1	yjm789			yjm789	0	1	1	1	1	1

## Sheet: SCE1
strain	SCEI present in		100%identical	100% identical
s288c	1		SCEI length=708	intron length=1143
SK1	1
yjm1078	0
yjm1083	1
yjm1129	0
yjm1133	1
yjm1190	1
yjm1199	1
yjm1202	1
yjm1208	1
yjm1242	0
yjm1244	0
yjm1248	0
yjm1250	0
yjm1252	0
yjm1273	0
yjm1304	1
yjm1307	1
yjm1311	1
yjm1326	1
yjm1332	1
yjm1336	0
yjm1338	0
yjm1341	0
yjm1342	0
yjm1355	1
yjm1356	0
yjm1381	1
yjm1383	1
yjm1385	1
yjm1386	1
yjm1387	0
yjm1388	0
yjm1389	0
yjm1399	0
yjm1400	0
yjm1401	1
yjm1402	0
yjm1415	0
yjm1417	0
yjm1418	0
yjm1419	1
yjm1433	0
yjm1434	0
yjm1439	0
yjm1443	0
yjm1444	1
yjm1447	0
yjm1450	0
yjm1460	0
yjm1463	0
yjm1477	0
yjm1478	0
yjm1479	0
yjm1526	0
yjm1527	0
yjm1549	0
yjm1573	0
yjm1574	1
yjm1592	0
yjm1615	1
yjm189	0
yjm193	1
yjm195	0
yjm244	0
yjm248	0
yjm270	0
yjm271	1
yjm320	1
yjm326	1
yjm428	1
yjm450	1
yjm451	1
yjm453	1
yjm456	1
yjm470	0
yjm541	1
yjm554	1
yjm555	1
yjm627	0
yjm681	1
yjm682	1
yjm683	1
yjm689	1
yjm693	1
YJM789	1
yjm969	0
yjm972	0
yjm975	0
yjm978	0
yjm981	0
yjm984	0
yjm987	0
yjm990	0
yjm993	0
yjm996	0
total	41

## Sheet: COB detail
	group	1		2		1			1		1		1
		I1α		I1β		I2			I3		I4		I5		total
		bi1α		bi1β		bi2			bi3		bi4		bi5
	position	394		415		429		length B type[68-75%ID]	506		758		806
COB	strains	intron1	length[99-100%ID]	intron2	length[89-100%ID]	intron3*	type	length - A type[99-100%ID]	intron4	length[89-100%ID]	intron5	length[98-100%ID]	intron6	length[83-100%ID]
	Q0045_s288c	0		1	768	1	A	1404	1	1623	1	1417	1	738	5950
	YJM1078	0		1	766	1	B	1467	1	1630	1	1420	1	784	6067
	YJM1083	0		1	768	1	A	1406	1	1698	1	1418	1	743	6033
	YJM1129	0		1	762	1	B	1506	1	1773	1	1421	1	784	6246
	YJM1133	0		1	768	1	A	1404	1	1697	1	1411	1	698	5978
	YJM1190	0		1	763	1	B	1549	1	1624	1	1411	1	699	6046
	YJM1199	0		1	768	1	A	1404	1	1697	1	1411	1	782	6062
	YJM1202	0		1	768	1	A	1404	1	1697	1	1411	1	782	6062
	YJM1208	0		1	768	1	A	1404	1	1697	1	1417	1	699	5985
	YJM1242	0		1	762	1	B	1467	1	1783	1	1420	1	704	6136
	YJM1244	0		1	763	1	B	1506	1	1628	1	1420	1	744	6061
	YJM1248	0		0		1	B	1633	1	1637	1	1413	1	792	5475
	YJM1250	0		1	854	1	A	1405	1	1630	1	1417	1	875	6181
	YJM1252	0		1	766	1	B	1506	1	1738	1	1420	1	783	6213
	YJM1273	0		1	778	1	A	1406	1	1675	1	1417	1	703	5979
	YJM1304	0		0		0			0		1	1411	1	699	2110
	YJM1307	0		1	769	1	A	1406	1	1623	1	1417	1	744	5959
	YJM1311	0		1	768	1	A	1404	1	1697	1	1420	1	743	6032
	YJM1326	0		1	763	1	B	1549	1	1624	1	1411	1	699	6046
	YJM1332	0		1	763	1	B	1553	1	1783	1	1415	1	737	6251
	YJM1336	0		1	763	1	B	1507	1	1777	1	1421	1	704	6172
	YJM1338	0		1	763	1	B	1506	1	1628	1	1415	1	705	6017
	YJM1341	0		1	763	1	B	1507	1	1691	1	1420	1	784	6165
	YJM1342	0		1	778	1	A	1405	1	1640	1	1412	1	703	5938
	YJM1355	0		1	768	1	A	1406	1	1626	1	1418	1	703	5921
	YJM1356	0		1	854	1	A	1405	1	1645	1	1414	1	740	6058
	YJM1381	0		1	782	1	A	1406	1	1642	1	1415	1	741	5986
	YJM1383	0		1	768	1	A	1404	1	1698	1	1417	1	778	6065
	YJM1385	0		1	768	1	A	1404	1	1697	1	1417	1	821	6107
	YJM1386	0		1	767	1	A	1404	1	1642	1	1420	1	821	6054
	YJM1387	0		0		0			1	1624	1	1417	1	707	3748
	YJM1388	0		0		0			0		1	1417	1	704	2121
	YJM1389	0		0		0			1	1624	1	1420	1	704	3748
	YJM1399	0		0		0			0		0		0		0
	YJM1400	1	1353	1	767	1	A	1432	1	1696	1	1411	1	703	7362
	YJM1401	0		1	768	1	A	1406	1	1625	1	1417	1	703	5919
	YJM1402	0		1	762	1	A	1406	1	1626	1	1417	1	701	5912
	YJM1415	0		1	763	1	B	1507	1	1772	1	1420	1	744	6206
	YJM1417	0		1	763	1	B	1506	1	1688	1	1421	1	741	6119
	YJM1418	0		0		0			1	1717	1	1417	1	698	3832
	YJM1419	0		1	766	1	A	1405	1	1649	1	1411	1	745	5976
	YJM1433	0		1	763	1	B	1507	1	1772	1	1415	1	744	6201
	YJM1434	0		1	778	1	A	1406	1	1675	1	1417	1	703	5979
	YJM1439	0		0		1	B	1633	1	1637	1	1413	1	792	5475
	YJM1443	0		0		0			0		1	1411	1	699	2110
	YJM1444	0		0		0			1	1627	1	1417	1	704	3748
	YJM1447	0		0		0			1	1625	1	1418	1	709	3752
	YJM1450	0		1	769	1	A	1404	1	1640	1	1418	1	698	5929
	YJM1460	0		0		0			1	1624	1	1420	1	704	3748
	YJM1463	0		1	771	1	A	1406	1	1693	1	1414	1	739	6023
	YJM1477	0		1	762	1	B	1467	1	1783	1	1420	1	704	6136
	YJM1478	0		1	763	1	B	1506	1	1689	1	1415	1	702	6075
	YJM1479	1	1353	1	767	1	A	1432	1	1696	1	1411	1	703	7362
	YJM1526	0		1	762	1	B	1506	1	1773	1	1421	1	784	6246
	YJM1527	0		1	769	1	A	1406	1	1627	1	1417	1	705	5924
	YJM1549	0		1	769	1	A	1406	1	1621	1	1415	1	787	5998
	YJM1573	0		1	762	1	A	1406	1	1626	1	1417	1	701	5912
	YJM1574	0		1	854	1	A	1405	1	1641	1	1421	1	825	6416
	YJM1592	0		0		0			1	1624	1	1420	1	704	3748
	YJM1615	0		1	768	1	A	1404	1	1697	1	1417	1	699	5985
	YJM189	0		1	763	1	B	1507	1	1772	1	1415	1	745	6202
	YJM193	0		1	762	1	B	1548	1	1630	1	1420	1	744	6104
	YJM195	0		1	766	1	A	1406	1	1680	1	1411	1	780	6043
	YJM244	0		1	763	1	B	1507	1	1772	1	1421	1	704	6167
	YJM248	0		1	766	1	B	1506	1	1630	1	1421	1	785	6108
	YJM270	0		1	855	1	A	1405	1	1641	1	1415	1	740	6056
	YJM271	0		1	762	1	B	1548	1	1630	1	1420	1	745	6105
	YJM320	0		1	768	1	A	1404	1	1697	1	1411	1	740	6020
	YJM326	1	1350	1	768	1	A	1404	1	1697	1	1411	1	740	7370
	YJM428	0		1	768	1	A	1406	1	1626	1	1418	1	703	5921
	YJM450	0		1	768	1	A	1404	1	1697	1	1411	1	782	6062
	YJM451	0		1	768	1	A	1406	1	1697	1	1418	1	703	5992
	YJM453	0		1	763	1	B	1507	1	1686	1	1414	1	737	6107
	YJM456	0		0		0			0		1	1411	1	699	2110
	YJM470	0		1	769	1	A	1407	1	1624	1	1418	1	704	5922
	YJM541	0		1	768	1	A	1404	1	1697	1	1411	1	740	6020
	YJM554	0		1	768	1	A	1404	1	1697	1	1411	1	740	6020
	YJM555	0		1	768	1	A	1404	1	1625	1	1414	1	700	5911
	YJM627	0		1	762	1	B	1547	1	1637	1	1413	1	792	6151
	YJM681	0		1	768	1	A	1404	1	1625	1	1420	1	698	5915
	YJM682	1	1350	1	768	1	A	1404	1	1698	1	1411	1	740	7371
	YJM683	1	1350	1	768	1	A	1404	1	1698	1	1411	1	740	7371
	YJM689	0		1	768	1	A	1406	1	1625	1	1420	1	698	5917
	YJM693	0		1	763	1	B	1507	1	1629	1	1416	1	759	6074
	YJM969	0		1	763	1	B	1507	1	1783	1	1420	1	744	6217
	YJM972	0		1	763	1	B	1507	1	1783	1	1420	1	744	6217
	YJM975	0		1	763	1	B	1507	1	1783	1	1420	1	744	6217
	YJM978	0		1	763	1	B	1507	1	1783	1	1420	1	744	6217
	YJM981	0		1	763	1	B	1507	1	1783	1	1420	1	744	6217
	YJM984	0		1	763	1	B	1507	1	1783	1	1420	1	744	6217
	YJM987	0		1	763	1	B	1507	1	1783	1	1420	1	744	6217
	YJM990	0		1	763	1	B	1507	1	1783	1	1420	1	744	6217
	YJM993	0		1	763	1	B	1507	1	1783	1	1420	1	744	6217
	YJM996	0		1	763	1	B	1507	1	1783	1	1420	1	744	6217
	sk1	0		0		1	B	1320+ assembly prob	1	1176+	1	1420	1	418+
	yjm789	0		1	784	1	A	1406	1	1470+	1	1417	1	699
total		5		81		84			91		95		95
max			1353		855			1633		1783		1421		875
min			1350		762			1404		1621		1411		698
avg			1351.2		770.728			1456.24		1685.07		1416.54		736.409

## Sheet: COX1 detail
	group	2 orf		2 orf		1 A orf B noOrf			orf		orf		1 orf		orf		1 orf		1 orf			2 no orf		total bp
		I1		I2		I3α			I3β		I3γ		I4α		I4β		I5α		I5β			I5γ
		ai1		ai2		ai3α			ai3β		ai3γ		ai4α		ai4β		ai5α		ai5β			ai5γ
COX1_s288c	cds positions	170		205		243			386		709		720		900		972		1107			1132
	strains	intron1	length [98-100%ID]	intron2	length [98-100%ID]	intron3*	type A or B	length [97-100, 74-76%ID]	intron4a	length	intron4b	length [92-100%ID]	intron4	length [99-100%ID]	intron5a	length [96-100%ID]	intron5	length [96-100%ID]	intron6*	types	length [90-100, 72-77%ID]	intron7	length [98-100%ID]
	Q0045_s288c	1	2448	1	2483	1	A	1516	0		0		1	1010	0		1	1363	1	A	1571	1	886	11277
	YJM1078	1	2448	0		1	A	1514	0		1	1942	0		0		0		1	A	1606	1	886	8396
	YJM1083	1	2448	1	2483	1	A	1513	0		0		1	1010	1	1473	0		1	A	1610	1	881	11418
	YJM1129	0		0		1	A	1515	0		1	1926	0		1	1473	0		1	A	1640	1	889	7443
	YJM1133	0		0		1	A	1516	0		1	1897	1	1010	1	1463	0		1	A	1573	1	881	7330
	YJM1190	1	2448	1	2483	1	A	1515	0		1	1896	1	1010	1	1458	0		1	A	1571	1	887	13628
	YJM1199	1	2448	1	2483	1	A	1516	0		1	1893	1	1010	0		1	1348	1	A	1534	1	881	13113
	YJM1202	1	2448	1	2483	1	A	1516	0		1	1897	1	1010	0		1	1348	1	A	1534	1	881	13117
	YJM1208	1	2448	0		1	A	1516	0		0		1	1010	1	1488	0		1	B	1749	0		8211
	YJM1242	1	2448	0		1	A	1515	0		1	1942	0		0		0		0			0		5905
	YJM1244	1	2448	0		1	A	1515	0		1	1942	0		0		0		0			0		5905
	YJM1248	1	2448	0		1	A	1514	0		0		1	1010	0		1	1348	0			0		6320
	YJM1250	0		1	2518	1	B	1662	0		0		1	1010	0		1	1344	1	B	1835	0		8369
	YJM1252	1	2448	1	2483	1	B	1644	0		1	1900	0		0		0		1	A	1567	1	886	10928
	YJM1273	0		1	2480	0			0		0		0		0		1	1350	1	A	1643	1	879	6352
	YJM1304	1	2448	1	2483	1	A	1514	0		0		1	1010	0		1	1348	1	A	1532	1	886	11221
	YJM1307	0		0		1	A	1514	0		0		1	1010	1	1468	0		1	A	1534	1	893	6419
	YJM1311	1	2448	0		1	A	1514	0		1	1898	1	1010	1	1463	0		1	A	1534	1	881	10748
	YJM1326	0		0		1	A	1514	0		1	1898	1	1010	1	1463	0		1	A	1534	1	886	8305
	YJM1332	0		0		0			0		0		1	1010	1	1463	0		1	A	1534	1	893	4900
	YJM1336	1	2448	0		1	A	1514	0		1	1942	0		0		1	1379	1	A	1534	1	893	9710
	YJM1338	0		1	2483	1	A	1514	0		1	1947	0		0		0		0			0		5944
	YJM1341	0		1	2518	1	A	1514	0		0		1	1010	0		1	1352	1	A	1567	1	886	8847
	YJM1342	1	2448	1	2483	1	B	1649	0		1	1821	0		0		0		1	A	1604	1	881	10886
	YJM1355	0		0		1	A	1515	0		0		1	1010	0		0		0			0		2525
	YJM1356	1	2448	0		1	A	1514	0		0		1	1010	0		0		1	A	1534	1	886	7392
	YJM1381	1	2448	0		1	A	1515	0		0		1	1010	1	1468	0		1	B	1273	1	882	8596
	YJM1383	1	2448	1	2483	1	A	1515	0		0		1	1010	1	1463	0		0			0		8919
	YJM1385	1	2448	1	2483	1	A	1550	0		1	1898	1	1010	1	1468	0		1	B	1272	1	882	13011
	YJM1386	1	2448	0		1	A	1544	0		1	1898	1	1010	1	1468	0		1	B	1273	1	887	10528
	YJM1387	1	2448	0		1	B	1655	0		1	1892	0		0		1	1350	1	A	1609	1	886	9840
	YJM1388	1	2448	1	2483	1	B	1644	0		0		0		0		0		1	A	1534	1	887	8996
	YJM1389	1	2448	1	2483	1	B	1644	0		0		1	1010	0		0		1	A	1641	1	887	10113
	YJM1399	1	2451	0		1	B-more diff	1659	1	1601	0		0		0		1	1345	1	B	1799	0		8855
	YJM1400	1	2448	1	2483	1	B	1675	0		0		1	1010	1	1478	0		1	A	1537	1	888	11519
	YJM1401	0		0		1	A	1515	0		0		1	1010	1	1458	0		1	A	1605	1	887	6475
	YJM1402	0		0		1	B	1644	0		1	1857	0		1	1484	0		1	A	1531	1	884	7400
	YJM1415	1	2448	1	2483	1	B	1644	0		1	1942	0		0		0		1	A	1534	1	886	10937
	YJM1417	0		1	2518	1	A	1514	0		0		1	1010	0		0		1	A	1534	1	886	7462
	YJM1418	0		0		1	B	1643	0		1	1860	0		0		1	1333	1	A	1608	1	889	7333
	YJM1419	1	2448	1	2483	1	A	1518	0		0		1	1010	0		1	1343	1	B	1756	0		10558
	YJM1433	0		1	2483	1	B	1659	0		0		1	1010	0		1	1340	0			0		6492
	YJM1434	0		1	2480	0			0		0		0		0		1	1350	1	A	1643	1	879	6352
	YJM1439	1	2448	0		1	A	1514	0		0		1	1010	0		1	1348	0			0		6320
	YJM1443	1	2448	1	2518	1	B	1673	0		0		1	1010	1	1484	0		1	B	1647	0		10780
	YJM1444	1	2448	1	2480	1	A	1514	0		0		1	1010	0		1	1348	1	A	1608	1	889	11297
	YJM1447	0		0		0			0		1	1897	0		1	1455	0		1	B	1680	0		5032
	YJM1450	0		0		1	B	1623	0		0		1	1010	1	1455	0		1	A	1644	1	886	6618
	YJM1460	1	2448	1	2483	1	B	1643	0		1	1908	0		0		0		1	A	1536	1	887	10905
	YJM1463	1	2448	0		0			0		0		1	1010	1	1463	0		0			0		4921
	YJM1477	1	2448	0		1	A	1515	0		1	1942	0		0		0		0			0		5905
	YJM1478	1	2448	1	2483	1	B	1643	0		1	1939	0		0		1	1340	0			0		9853
	YJM1479	1	2448	1	2483	1	B	1675	0		0		1	1010	1	1478	0		1	A	1537	1	888	11519
	YJM1526	0		0		1	A	1515	0		1	1926	0		1	1473	0		1	A	1640	1	889	7443
	YJM1527	0		1	2518	1	A	1514	0		0		0		0		1	1335	1	A	1531	1	884	7782
	YJM1549	0		0		0			0		0		1	1010	1	1468	0		1	A	1535	1	893	4906
	YJM1573	0		0		1	B	1644	0		1	1857	0		1	1484	0		1	A	1531	1	885	7401
	YJM1574	0		0		1	A	1516	0		0		1	1010	0		0		1	A	1607	1	893	5026
	YJM1592	1	2448	1	2483	1	B	1644	0		0		1	1010	0		0		1	A	1641	1	887	10113
	YJM1615	1	2448	0		1	A	1516	0		0		1	1010	1	1488	0		1	B	1749	0		8211
	YJM189	0		1	2483	1	A	1514	0		1	1942	0		0		0		0			0		5939
	YJM193	1	2448	1	2483	1	A	1515	0		0		1	1010	0		0		0			0		7456
	YJM195	1	2448	1	2483	0			0		0		1	1010	1	1473	0		0			0		7414
	YJM244	0		1	2483	1	A	1515	0		1	1943	0		0		0		0			0		5941
	YJM248	1	2448	1	2518	1	B	1644	0		1	1900	0		0		0		1	A	1606	1	886	11002
	YJM270	0		0		1	A	1517	0		1	1930	0		1	1473	0		1	A	1708	1	892	7520
	YJM271	1	2448	1	2483	1	A	1515	0		0		1	1010	0		0		0			0		7456
	YJM320	1	2448	0		1	A	1515	0		1	1897	1	1010	1	1463	0		1	A	1534	1	881	10748
	YJM326	1	2448	0		1	A	1515	0		1	1897	1	1010	1	1463	0		1	A	1534	1	881	10748
	YJM428	1	2448	0		1	A	1515	0		0		1	1010	0		0		1	A	1534	1	881	7388
	YJM450	1	2448	0		1	A	1514	0		0		1	1010	0		1	1348	1	A	1573	1	881	8774
	YJM451	1	2448	0		1	A	1515	0		0		1	1010	1	1488	0		1	B	1749	0		8210
	YJM453	1	2448	0		1	A	1515	0		0		1	1010	0		0		1	A	1534	1	893	7400
	YJM456	1	2448	1	2483	1	A	1514	0		0		1	1010	1	1484	0		1	B	1715	0		10654
	YJM470	1	2448	1	2482	1	B	1659	0		0		1	1010	0		1	1344	1	B	1757	0		10700
	YJM541	1	2448	0		1	A	1515	0		1	1897	1	1010	1	1463	0		1	A	1534	1	881	10748
	YJM554	1	2448	0		1	A	1515	0		1	1897	1	1010	1	1463	0		1	A	1534	1	881	10748
	YJM555	1	2448	0		1	A	1515	0		0		1	1010	1	1463	0		1	A	1534	1	881	8851
	YJM627	1	2448	0		1	A	1514	0		0		1	1010	0		1	1348	0			0		6320
	YJM681	0		0		1	A	1515	0		0		1	1010	1	1463	0		1	A	1571	1	887	6446
	YJM682	1	2448	0		1	A	1515	0		1	1897	1	1010	1	1463	0		1	A	1534	1	881	10748
	YJM683	1	2448	0		1	A	1515	0		1	1897	1	1010	1	1463	0		1	A	1533	1	881	10747
	YJM689	0		0		1	A	1516	0		0		1	1010	1	1473	0		1	A	1641	1	882	6522
	YJM693	1	2448	1	2483	1	A	1550	0		1	1898	1	1010	0			1344	1	A	1610	1	881	13244
	YJM969	0		1	2483	1	B	1644	0		0		0		0		0		1	A	1534	1	893	6554
	YJM972	0		1	2483	1	B	1644	0		0		0		0		0		1	A	1534	1	893	6554
	YJM975	0		1	2483	1	B	1644	0		0		0		0		0		1	A	1534	1	893	6554
	YJM978	0		1	2483	1	B	1644	0		0		0		0		0		1	A	1534	1	893	6554
	YJM981	0		1	2483	1	B	1644	0		0		0		0		0		1	A	1534	1	893	6554
	YJM984	0		1	2483	1	B	1644	0		0		0		0		0		1	A	1534	1	893	6554
	YJM987	0		1	2483	1	B	1644	0		0		0		0		0		1	A	1534	1	893	6554
	YJM990	0		1	2483	1	B	1644	0		0		0		0		0		1	A	1534	1	893	6554
	YJM993	0		1	2483	1	B	1644	0		0		0		0		0		1	A	1534	1	893	6554
	YJM996	0		1	2483	1	B	1644	0		0		0		0		0		1	A	1534	1	893	6554
	sk1	1	2448	0		1	A	1514	0		0		1	1010	1	1185+	0		1	A	1536	1	893
	yjm789	1	2448	1	2483	1	A	1515	0		1	1909	1	1010	1	1223+	0		1	A	1572	1	881
total		58		49		89			1		38		59		40		22		79			69
max			2451		2518			1675				1947		1010		1488		1379			1835		893
min			2448		2480			1513				1821		1010		1455		1333			1272		879
avg			2448.05		2487.08			1562.6				1906.87		1010		1469.53		1347.65			1576.68		886.478

## Sheet: totals
strain	SCE1	SCE1 (bp)	# of cob introns	total_cob introns (bp)	# of cox1 introns	total_cox1 introns (bp)	total # of introns	total introns (bp)	mito_length	intron bp as % of mitochondrial genome length
S288c	1	1143	5	5950	7	11277	13	18370	85779	0.214
YJM1078	0	0	5	6067	5	8396	10	14463	82025	0.183
YJM1083	1	1143	5	6033	7	11418	13	18594	89444	0.208
YJM1129	0	0	5	6246	5	7443	10	13689	81706	0.168
YJM1133	1	1143	5	5978	6	7330	12	14451	84963	0.17
YJM1190	1	1143	5	6046	8	13628	14	20817	88994	0.234
YJM1199	1	1143	5	6062	8	13113	14	20318	90633	0.224
YJM1202	1	1143	5	6062	8	13117	14	20322	90638	0.224
YJM1208	1	1143	5	5985	5	8211	11	15339	84252	0.182
YJM1242	0	0	5	6136	3	5905	8	12041	95658	0.126
YJM1244	0	0	5	6061	3	5905	8	11966	83285	0.144
YJM1248	0	0	4	5475	4	6320	8	11795	81013	0.146
YJM1250	0	0	5	6181	5	8369	10	14550	88746	0.163
YJM1252	0	0	5	6213	6	10928	11	17141	83856	0.204
YJM1273	0	0	5	5979	4	6352	9	12331	77475	0.159
YJM1304	1	1143	2	2110	7	11221	10	14474	81083	0.178
YJM1307	1	1143	5	5959	5	6419	11	13521	79733	0.17
YJM1311	1	1143	5	6032	7	10748	13	17923	87022	0.206
YJM1326	1	1143	5	6046	6	8305	12	15494	85887	0.18
YJM1332	1	1143	5	6251	4	4900	10	12294	81501	0.151
YJM1336	0	0	5	6172	6	9710	11	15882	82967	0.191
YJM1338	0	0	5	6017	3	5944	8	11961	80970	0.148
YJM1341	0	0	5	6165	6	8847	11	15012	84119	0.178
YJM1342	0	0	5	5938	6	10886	11	16824	85762	0.19
YJM1355	1	1143	5	5921	2	2525	8	9589	79418	0.121
YJM1356	0	0	5	6058	5	7392	10	13450	84849	0.158
YJM1381	1	1143	5	5986	6	8596	12	15725	83874	0.187
YJM1383	1	1143	5	6065	5	8919	11	16127	86820	0.186
YJM1385	1	1143	5	6107	8	13011	14	20261	92176	0.22
YJM1386	1	1143	5	6054	7	10528	13	17725	85554	0.207
YJM1387	0	0	3	3748	6	9840	9	13588	80666	0.168
YJM1388	0	0	2	2121	5	8996	7	11117	77572	0.143
YJM1389	0	0	3	3748	6	10113	9	13861	80794	0.172
YJM1399	0	0	0	0	5	8855	5	8855	73450	0.121
YJM1400	0	0	6	7362	7	11519	13	18881	88306	0.214
YJM1401	1	1143	5	5919	5	6475	11	13537	81306	0.166
YJM1402	0	0	5	5912	5	7400	10	13312	78309	0.17
YJM1415	0	0	5	6206	6	10937	11	17143	83950	0.204
YJM1417	0	0	5	6119	5	7462	10	13851	82284	0.168
YJM1418	0	0	3	3832	5	7333	8	11165	76794	0.145
YJM1419	1	1143	5	5976	6	10558	12	17677	84604	0.209
YJM1433	0	0	5	6201	4	6492	9	12693	81976	0.155
YJM1434	0	0	5	5979	4	6352	9	12331	77515	0.159
YJM1439	0	0	4	5475	4	6320	8	11795	80882	0.146
YJM1443	0	0	2	2110	6	10780	8	12890	77956	0.165
YJM1444	1	1143	3	3748	7	11297	11	16188	83736	0.192
YJM1447	0	0	3	3752	3	5032	6	8784	74237	0.118
YJM1450	0	0	5	5929	5	6618	10	12547	76603	0.164
YJM1460	0	0	3	3748	6	10905	9	14653	82773	0.177
YJM1463	0	0	5	6023	3	4921	8	10944	79676	0.137
YJM1477	0	0	5	6136	3	5905	8	12041	79244	0.152
YJM1478	0	0	5	6075	5	9853	10	15928	83765	0.19
YJM1479	0	0	6	7362	7	11519	13	18881	88309	0.214
YJM1526	0	0	5	6246	5	7443	10	13689	81825	0.167
YJM1527	0	0	5	5924	5	7782	10	13706	78596	0.174
YJM1549	0	0	5	5998	4	4906	9	10904	78275	0.139
YJM1573	0	0	5	5912	5	7401	10	13313	78385	0.17
YJM1574	1	1143	5	6416	4	5026	10	12585	79923	0.157
YJM1592	0	0	3	3748	6	10113	9	13861	80788	0.172
YJM1615	1	1143	5	5985	5	8211	11	15339	84325	0.182
YJM189	0	0	5	6202	3	5939	8	12141	80811	0.15
YJM193	1	1143	5	6104	4	7456	10	14703	84644	0.174
YJM195	0	0	5	6043	4	7414	9	13457	78961	0.17
YJM244	0	0	5	6167	3	5941	8	12108	80737	0.15
YJM248	0	0	5	6108	6	11002	11	17110	86593	0.198
YJM270	0	0	5	6056	5	7520	10	13576	82331	0.165
YJM271	1	1143	5	6105	4	7456	10	14704	84530	0.174
YJM320	1	1143	5	6020	7	10748	13	17911	86949	0.206
YJM326	1	1143	6	7370	7	10748	14	19261	91172	0.211
YJM428	1	1143	5	5921	5	7388	11	14452	85782	0.168
YJM450	1	1143	5	6062	6	8774	12	15979	86522	0.185
YJM451	1	1143	5	5992	5	8210	11	15345	84234	0.182
YJM453	1	1143	5	6107	5	7400	11	14650	82494	0.177
YJM456	1	1143	2	2110	6	10654	9	13907	79631	0.175
YJM470	0	0	5	5922	6	10700	11	16622	83571	0.199
YJM541	1	1143	5	6020	7	10748	13	17911	87003	0.206
YJM554	1	1143	5	6020	7	10748	13	17911	87008	0.206
YJM555	1	1143	5	5911	6	8851	12	15905	84193	0.189
YJM627	0	0	5	6151	4	6320	9	12741	80791	0.158
YJM681	1	1143	5	5915	5	6446	11	13504	81045	0.167
YJM682	1	1143	6	7371	7	10748	14	19262	88887	0.217
YJM683	1	1143	6	7371	7	10747	14	19261	88953	0.216
YJM689	1	1143	5	5917	5	6522	11	13582	84098	0.161
YJM693	1	1143	5	6074	8	13244	14	20461	89161	0.229
YJM969	0	0	5	6217	4	6554	9	12271	79066	0.155
YJM972	0	0	5	6217	4	6554	9	12271	78907	0.155
YJM975	0	0	5	6217	4	6554	9	12271	78950	0.155
YJM978	0	0	5	6217	4	6554	9	12271	78916	0.155
YJM981	0	0	5	6217	4	6554	9	12271	78916	0.155
YJM984	0	0	5	6217	4	6554	9	12271	78907	0.155
YJM987	0	0	5	6217	4	6554	9	12271	78974	0.155
YJM990	0	0	5	6217	4	6554	9	12271	78916	0.155
YJM993	0	0	5	6217	4	6554	9	12271	78907	0.155
YJM996	0	0	5	6217	4	6554	9	12271	78907	0.155
